# Supplementary material for: Study on the Concentration of Acrylic Acid and Acetic Acid by Reverse Osmosis
Source: MDPI journal article supplement (doi:10.3390/membranes10070142), 2020-07-06
Supplement: s1 [file s1]

## **Cover Page for Supplementary Materials**

### **Manuscript title:**

Study on the concentration of acrylic acid and acetic acid by reverse osmosis

### **Author list:**

Qian Liu <sup>1,2</sup>, Lixin Xie <sup>1,2,\*</sup>, Hanxiao Du <sup>1,2</sup>, Shichang Xu <sup>1,2</sup>, and Yawei Du <sup>3,\*</sup>

<sup>1</sup> School of Chemical Engineering and Technology, Tianjin University, Tianjin 300072, P. R. China;

<sup>2</sup> Tianjin Key Laboratory of Membrane Science and Desalination Technology, State Key Laboratory of Chemical Engineering (Tianjin University), Tianjin 300072, P. R. China;

<sup>3</sup> School of Chemical Engineering and Technology, Hebei University of Technology, Tianjin 300130, P. R. China;

\*Correspondence: xie\_lixin@tju.edu.cn (L.X.X.); sonicduyawei001@126.com (Y.W.D);

**Total number of pages (including the cover page): 8 pages**

### **List of Tables and Figures:**

- |               |                                                                                                                                                                 |
|---------------|-----------------------------------------------------------------------------------------------------------------------------------------------------------------|
| <b>Page 3</b> | <b>Figure S1 Determination of the water permeability of the membranes for the acid solution.</b>                                                                |
| <b>Page 4</b> | <b>Figure S2 Determination of the acid transport coefficients of the C5 (a) and C6 (b) by fitting the acid retention and water flux at different pressures.</b> |
| <b>Page 5</b> | <b>Table S1. Comparison of the acetic retention with those in the literature.</b>                                                                               |
| <b>Page 6</b> | <b>Figure S3 AFM images of RO membranes: (a, d) prior to exposure and (b, c, e, f) after 6 months of exposure to the acid solutions.</b>                        |
| <b>Page 7</b> | <b>Figure S4. The C1s spectra and N1s spectra of C5 membranes: (a, b) prior to exposure and (c, d, e, f) after 6 months of exposure to</b>                      |

**the acid solutions.**

**Page 8      Figure S5 The C1s spectra and N1s spectra of C6 membranes: (a, b) prior to exposure and (c, d, e, f) after 6 months of exposure to the acid solutions.**

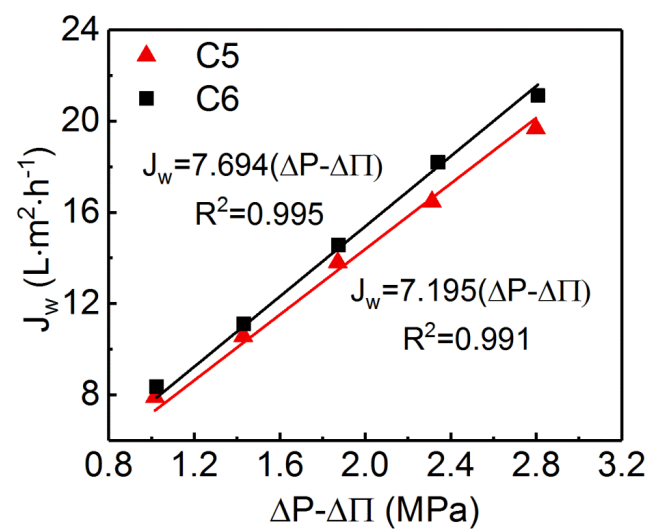

**Figure S1.** Determination of the water permeability of the membranes for the acid solution.

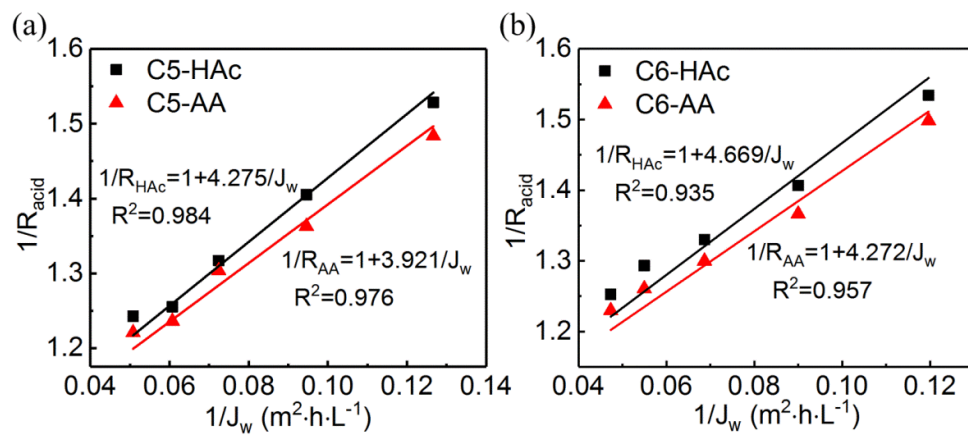

**Figure S2.** Determination of the acid transport coefficients of the C5 (a) and C6 (b) by fitting the acid retention and water flux at different pressures.

**Table S1.** Comparison of the acetic retention with those in the literature.

| Membrane | Pressure (MPa) | pH   | Feed solution                             | HAc retention (%) | Ref.      |
|----------|----------------|------|-------------------------------------------|-------------------|-----------|
| AG       | 4.0            | -    | 7% HAc+15% glucose                        | < 40              | [27]      |
| RO98pHt  | 4.0            | 2.93 | 25 g/L xylose+10g/L glucose+<br>5 g/L HAc | 65.94             | [20]      |
| BW30FR   | 4.0            | 2.78 | model solution                            | 78.72             | [29]      |
| XLE      | 3.0            | 3    | model solution                            | 80                | [30]      |
| C5       | 4.0            | 2.39 | 2.5% AA+1.5% HAc                          | 81.92             | This work |
| C6       | 4.0            | 2.39 | 2.5% AA+1.5% HAc                          | 81.32             |           |

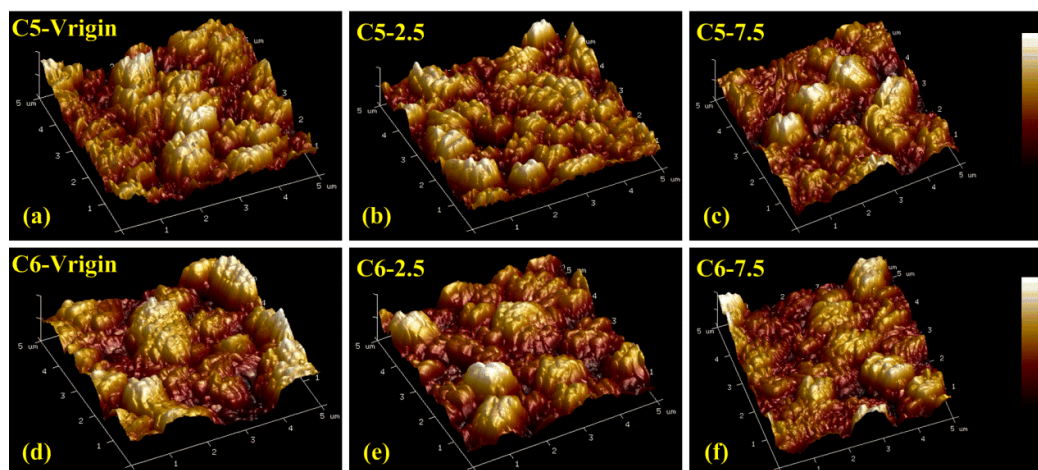

**Figure S3.** AFM images of RO membranes: (a, d) prior to exposure and (b, c, e, f) after 6 months of exposure to the acid solutions.

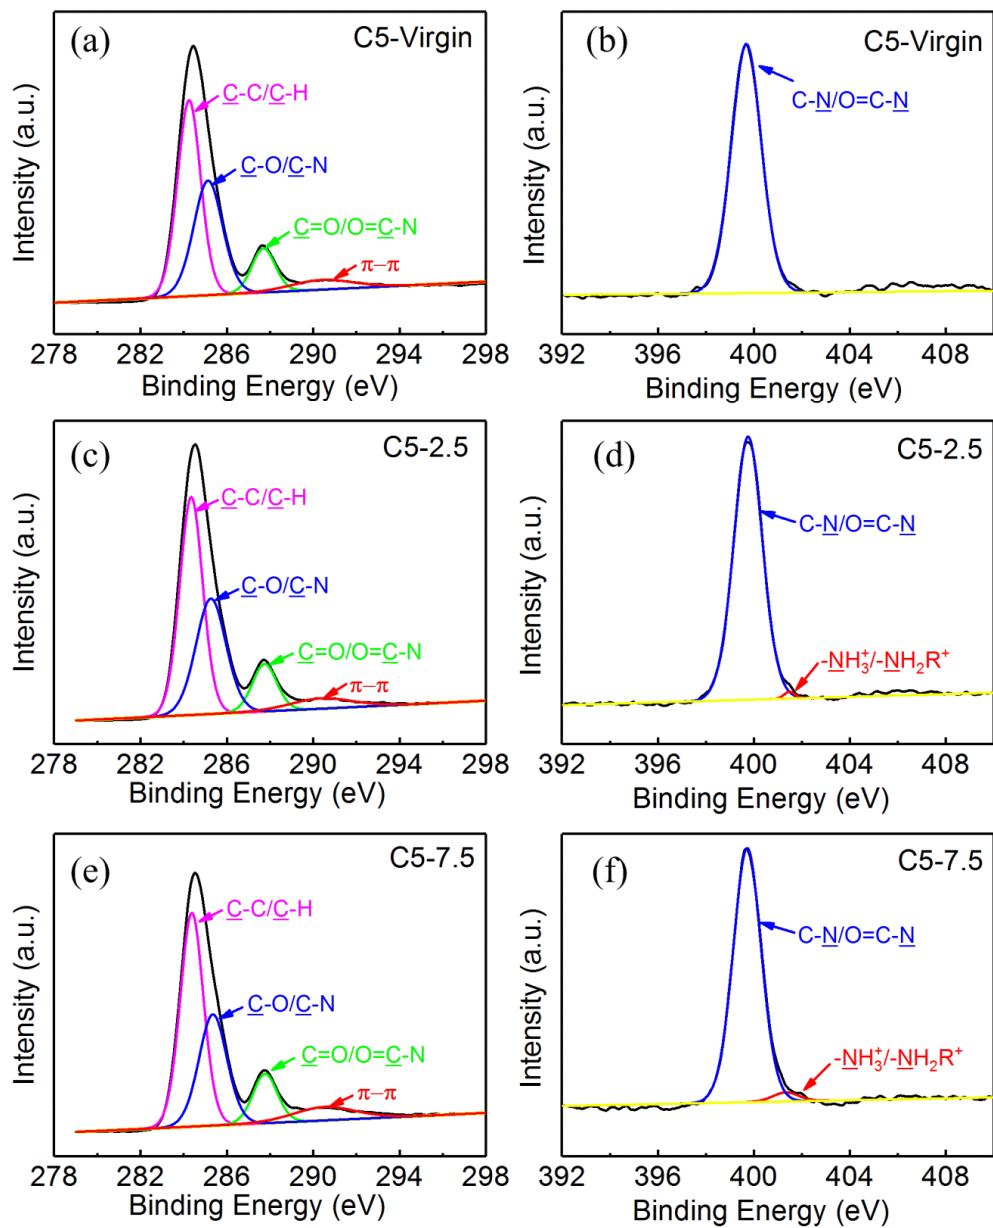

**Figure S4.** The C1s spectra and N1s spectra of C5 membranes: (a, b) prior to exposure and (c, d, e, f) after 6 months of exposure to the acid solutions.

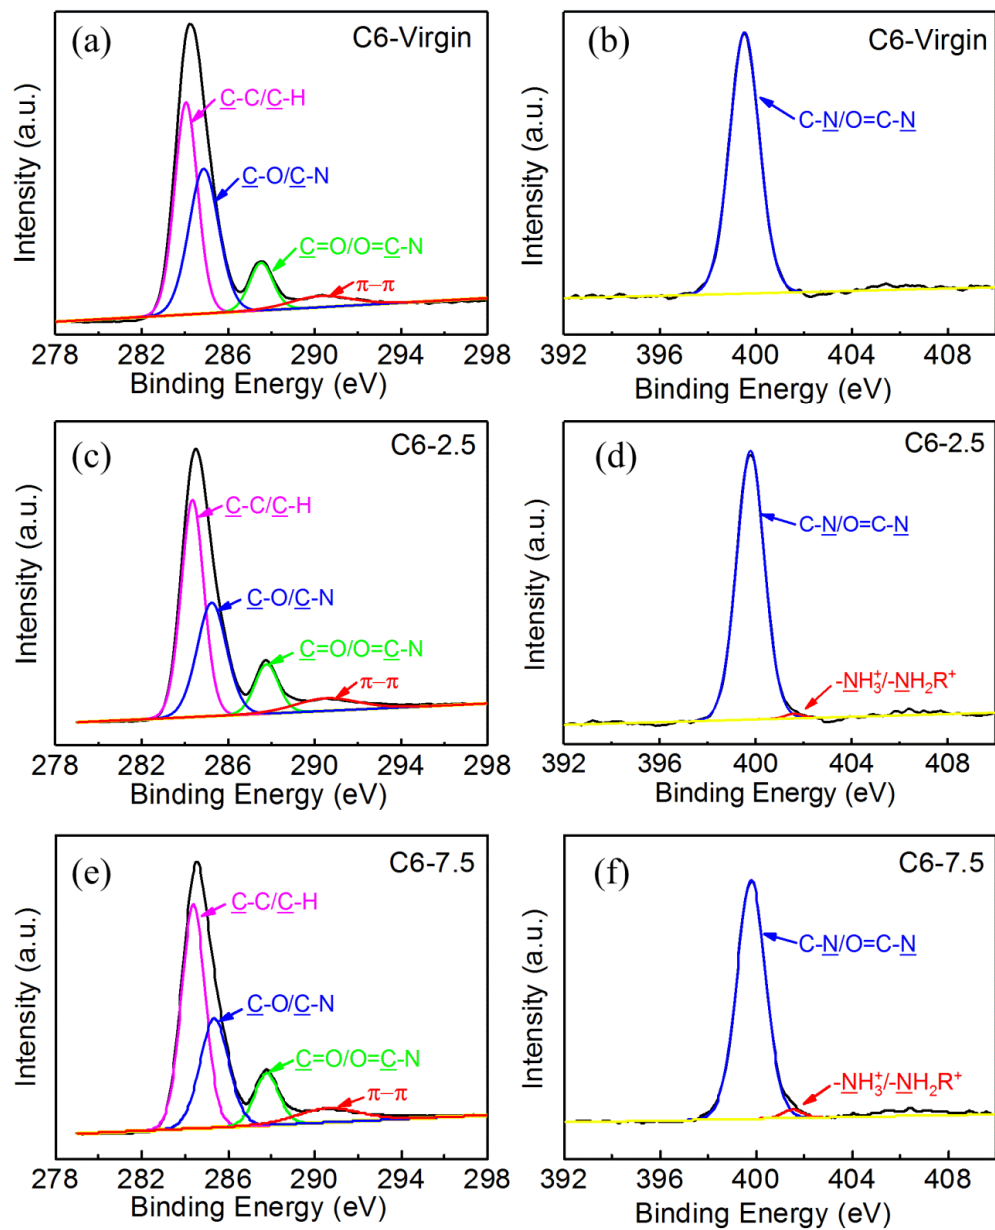

**Figure S5.** The C1s spectra and N1s spectra of C6 membranes: (a, b) prior to exposure and (c, d, e, f) after 6 months of exposure to the acid solutions.
